# Supplementary material for: Nanobodies mapped to cross-reactive and divergent epitopes on A(H7N9) influenza hemagglutinin using yeast display
Source: PubMed Central journal article supplement (PMC7862619; doi:10.1038/s41598-021-82356-4), 2021-02-04
Supplement: 41598_2021_82356_MOESM1_ESM.pdf [file 41598_2021_82356_MOESM1_ESM.pdf]

## Supplementary Information

### Nanobodies mapped to cross-reactive and divergent epitopes on A(H7N9) influenza hemagglutinin using yeast display.

<sup>1</sup>Tiziano Gaiotto, <sup>1</sup>Walter Ramage, <sup>1</sup>Christina Ball, <sup>1</sup>Paul Risley, <sup>3</sup>George W Carnell, <sup>3</sup>Nigel Temperton, <sup>2</sup>Othmar G Engelhardt, <sup>1</sup>Simon E Hufton\*

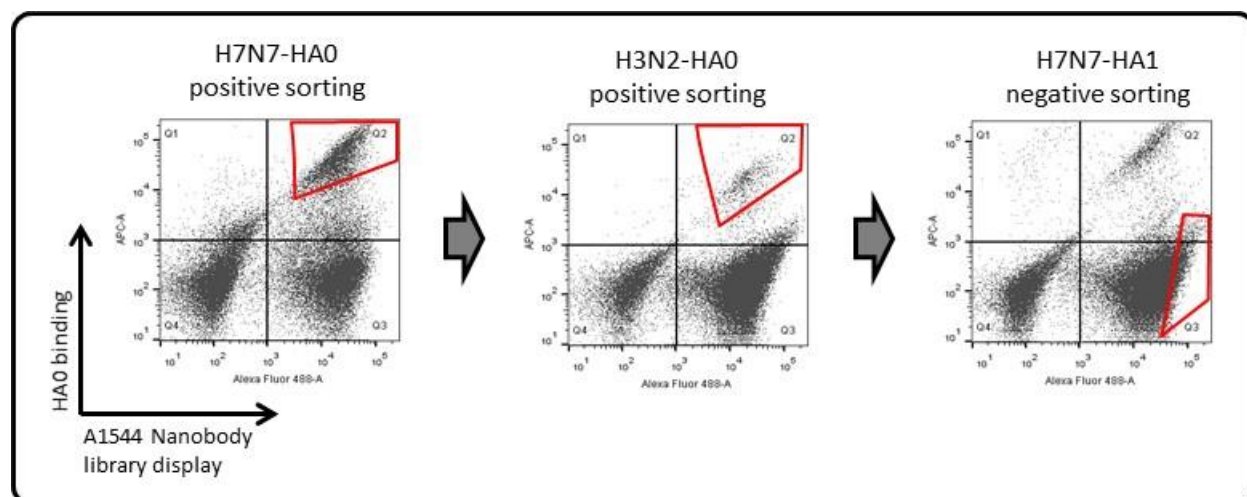

**Fig S1. Guided yeast library cell sorting for stem specific binding nanobodies.**

FACS plots (FlowJo 10.4 software) showing the initial positive sorting of yeast Nb library using recombinant H7N7 HA0 (A/chicken/Netherlands/1/2003), followed by a second round of positive sorting using recombinant H3N2 HA0 (A/Brisbane/10/2007) and by a third round of negative sorting using recombinant H7N7 HA1 (A/chicken/Netherlands/1/2003). For each round the gated population for cell sorting is shown in red.

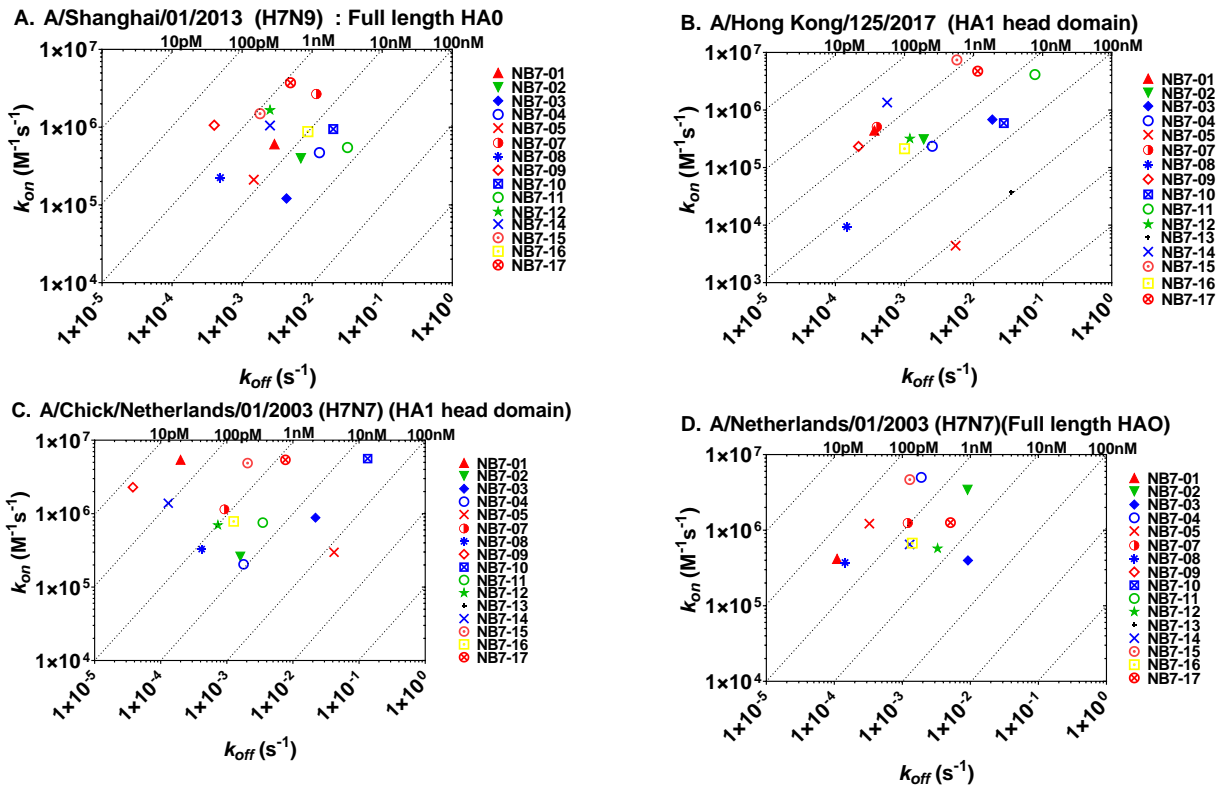

**Fig S2. Binding constants ( $k_{on}$  and  $k_{off}$ ) on recombinant HA0 and HA1.** Single cycle kinetic data are presented as rate plots with iso-affinity diagonals (RAPID) where the diagonals (dotted lines) are connecting the points of equal dissociation constant ( $K_D$ ). Affinity on (A) recombinant HA0 from A/Shanghai/01/2013 (H7N9), (B) recombinant HA1 head domain from A/Hong Kong/125/2017 (H7N9) (C) recombinant HA1 head domain from A/Chick/Netherlands/01/2003 (H7N7)(D) recombinant HA0 from A/Netherlands/219/2003 (H7N7). Fitting was with a 1:1 Langmuir fitting model using Biacore T200 evaluation software 3.1 software. Equilibrium dissociation constants ( $K_D$ ) are given in Table 2.

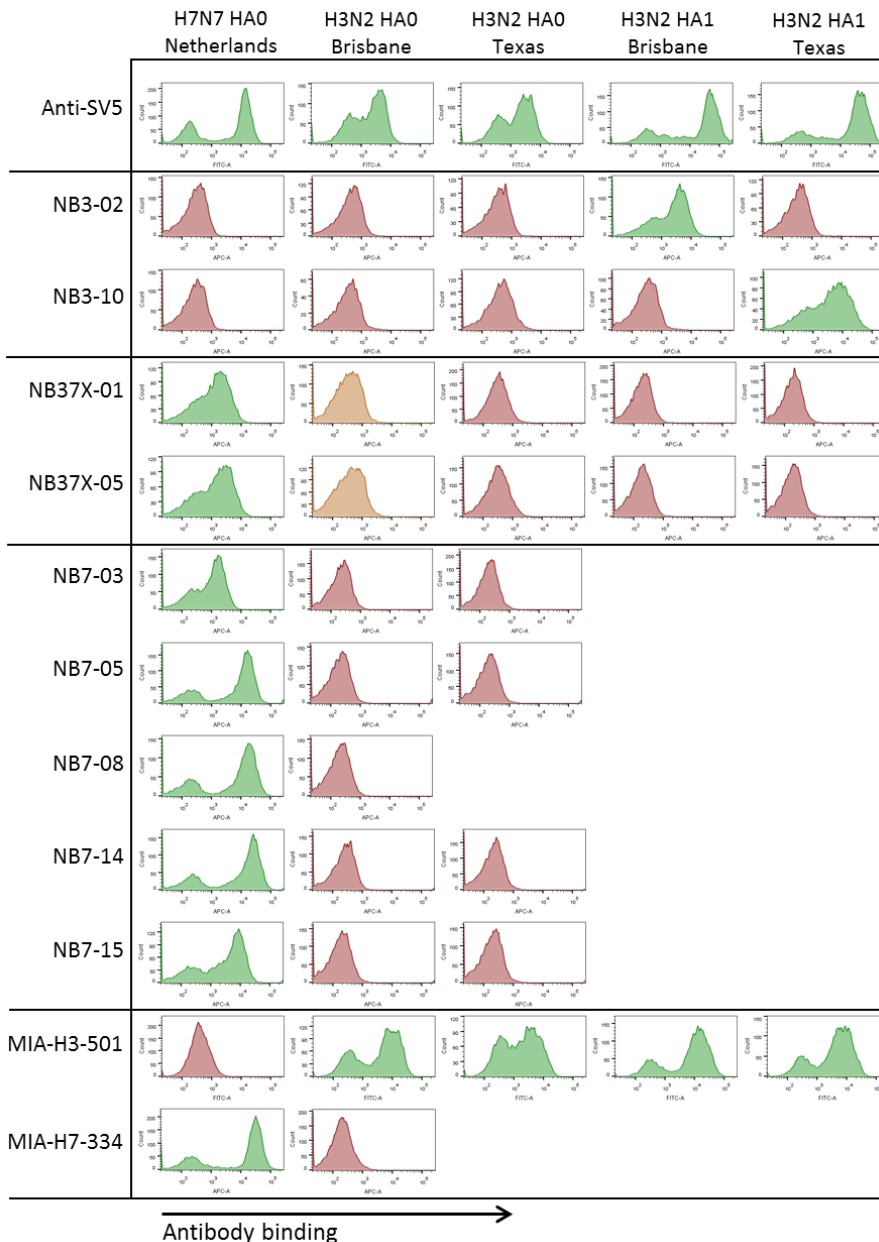

**Fig S3. Nb binding to yeast displayed wild type HA (full-length HA0 or head domain HA1).** Anti SV5 measures HA display via epitope tag. NB3-02 and NB3-10 are nanobodies against H3-HA1 domain as controls to confirm display of H3N2-HA1 on yeast. NB37X-01 and NB37X-05 are cross reactive nanobodies. NB7-03, NB7-05, NB7-08, NB7-14, NB7-15 are nanobodies specific to H7-HA. MIA-H3-501 is control mAb specific for H3N2-HA0. MIA-H7-334 is control mAb specific for H7N7-HA0. HA0 precursor gene of A/Brisbane/10/2007 (H3N2) (Q1-D487 mature protein numbering). HA1 head domain of A/Brisbane/10/2007 (H3N2) (Q1-R329). HA0 precursor gene of A/Netherlands/219/2003 (H7N7) (D1-V508 mature protein numbering). HA0 precursor gene of A/Texas/50/2012 (H3N2) (Q1-D512 mature protein numbering). HA1 head domain of A/Texas/50/2012 (H3N2) (Q1-R328). Green histograms indicate binding, red is no binding and amber is partial binding.

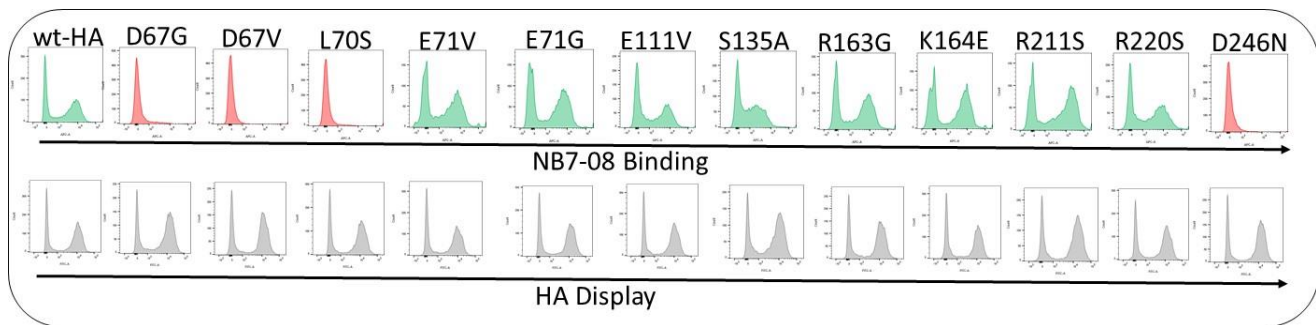

**FIG S4. Example flow cytometry histograms showing NB7-08 binding to yeast displayed wild-type HA and complete panel of HA mutants.** Green indicates mutation has no effect on NB7-08 binding, red indicate NB7-08 binding is lost. Grey histograms indicate HA display and show mutations do not affect the level of HA display.

**Table S1. H7N9 amino acid variability at the 5 distinct nanobody binding epitopes.**

| Ag site* | E                  |     |     |      | A    | -    | A    | -               | D    | -    | Stem |      |      |      |      |
|----------|--------------------|-----|-----|------|------|------|------|-----------------|------|------|------|------|------|------|------|
|          | Gp1a/1b/1c/1d/ Gp2 |     |     |      |      | Gp3  |      |                 | Gp4  |      | Gp5  |      |      |      |      |
| aa**     | D67                | L70 | E71 | S135 | D246 | E111 | R163 | K164            | R211 | R220 | M102 | E103 | E114 | M115 | Y119 |
| A        |                    |     |     |      |      |      |      |                 |      |      |      |      |      |      |      |
| C        |                    |     |     |      |      |      |      |                 |      |      |      |      |      |      | 1    |
| D        | 324                |     |     |      | 312  |      |      | 4               |      |      |      |      |      |      |      |
| E        |                    |     | 313 |      | 11   | 324  |      | 3 <sup>a</sup>  |      |      |      | 319  | 324  |      |      |
| F        |                    |     |     |      |      |      |      |                 |      |      |      |      |      |      |      |
| G        |                    |     |     |      |      |      |      |                 |      |      |      |      |      |      |      |
| H        |                    |     |     |      |      |      |      |                 |      |      |      |      |      |      |      |
| I        |                    |     |     |      |      |      |      |                 |      | 7    |      |      |      |      |      |
| K        |                    |     | 11  |      |      |      | 2    | 286             |      |      |      |      |      |      |      |
| L        |                    | 324 |     |      |      |      |      |                 |      |      |      |      |      |      |      |
| M        |                    |     |     |      |      |      |      |                 |      |      | 323  |      |      | 324  |      |
| N        |                    |     |     |      |      |      |      | 26 <sup>b</sup> |      |      |      |      |      |      |      |
| P        |                    |     |     |      |      |      | 3    |                 |      |      |      |      |      |      |      |
| Q        |                    |     |     |      |      |      |      |                 |      |      |      |      |      |      |      |
| R        |                    |     |     |      |      |      | 317  |                 | 324  | 317  |      |      |      |      |      |
| S        |                    |     |     | 324  |      |      |      | 7               |      |      |      |      |      |      |      |
| T        |                    |     |     |      |      |      | 2    |                 |      |      | 1    |      |      |      |      |
| V        |                    |     |     |      | 1    |      |      |                 |      |      |      | 5    |      |      |      |
| W        |                    |     |     |      |      |      |      |                 |      |      |      |      |      |      |      |
| Y        |                    |     |     |      |      |      |      |                 |      |      |      |      |      |      | 323  |
| X        |                    |     |     |      |      |      |      |                 |      |      |      |      |      |      |      |

\* Antigenic site A/B/C/D/E (H3 numbering) [1]

\*\*H7 amino acids numbering is from the first residue of the mature protein with DKIC

A total of 324 complete protein sequences corresponding to H7N9 strains were retrieved from NCBI influenza database.

a. K164E substitution present in A/Guangdong/17SF003/2017 (H7N9).

b. K164N substitution present in A/NewYork/107/2003 (H7N2)

1. Yang, H., et al., *Structural and Molecular Characterization of the Hemagglutinin from the Fifth-Epidemic-Wave A(H7N9) Influenza Viruses*. J Virol, 2018. **92**(16).
2. Wiley, D.C., I.A. Wilson, and J.J. Skehel, *Structural identification of the antibody binding sites of Hong Kong in influenza haemagglutinin and their involvement in antigenic variation*. Nature, 1981. **289**(5796): p.373-8
